# Supplementary material for: Investigation of NH3 and NH4+ adsorbed on ZSM-5 zeolites by near and middle infrared spectroscopy
Source: Royal Society of Chemistry journal article supplement (doi:10.1039/c5cy00753d), 2015-01-01
Supplement: c5cy00753d1.pdf [file c5cy00753d1.pdf]

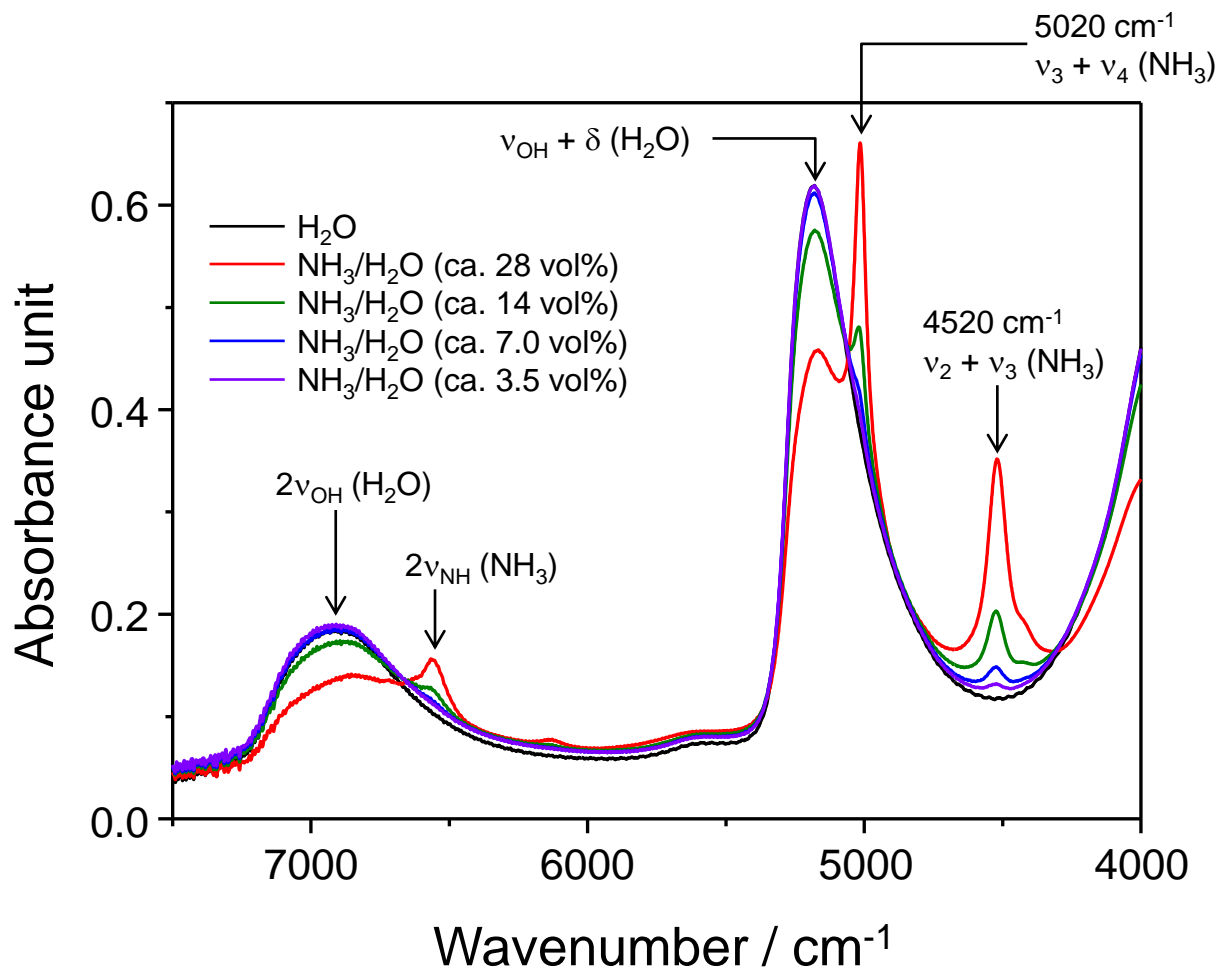

Fig. S1 NIR absorption spectra of NH<sub>3</sub> aqueous solution.

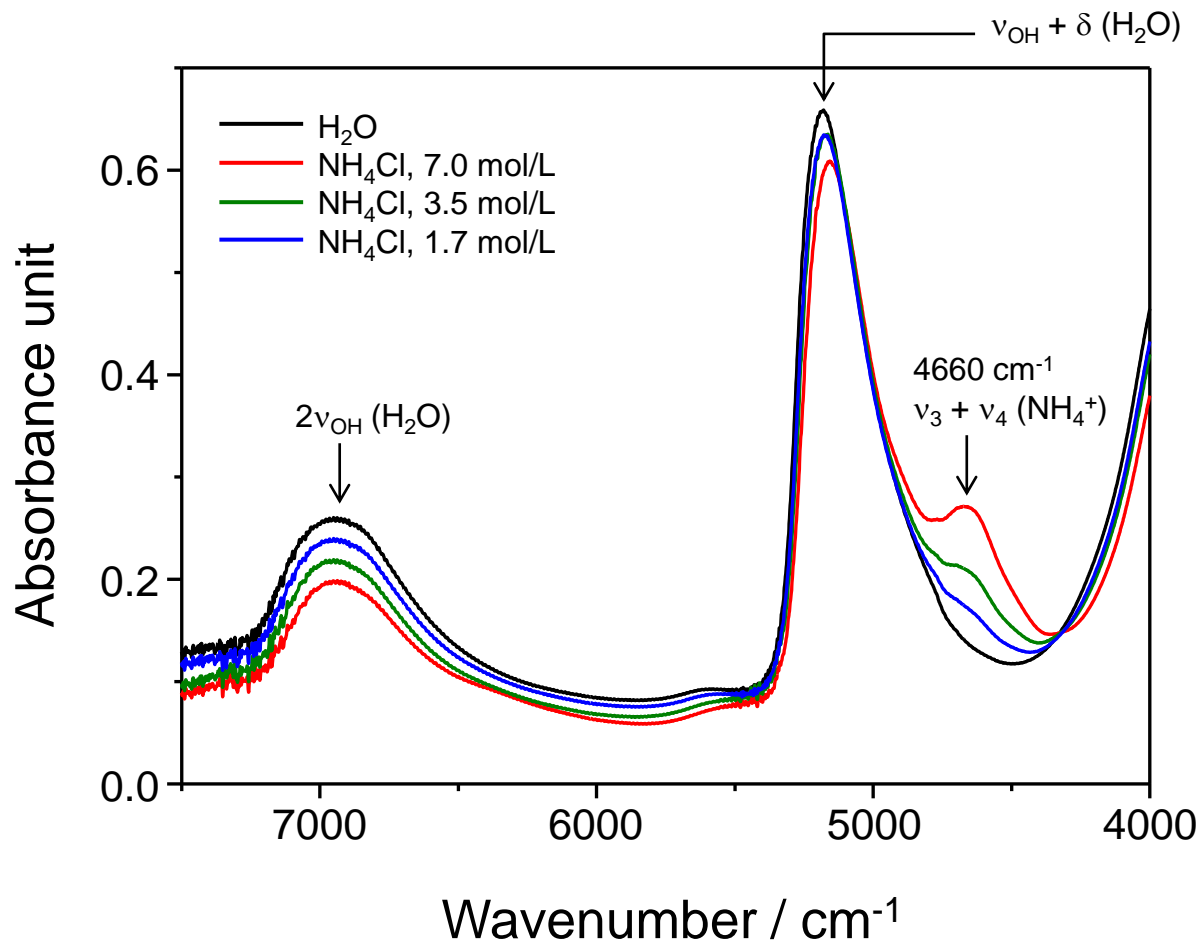

Fig. S2 NIR absorption spectra of  $\text{NH}_4\text{Cl}$  aqueous solution.

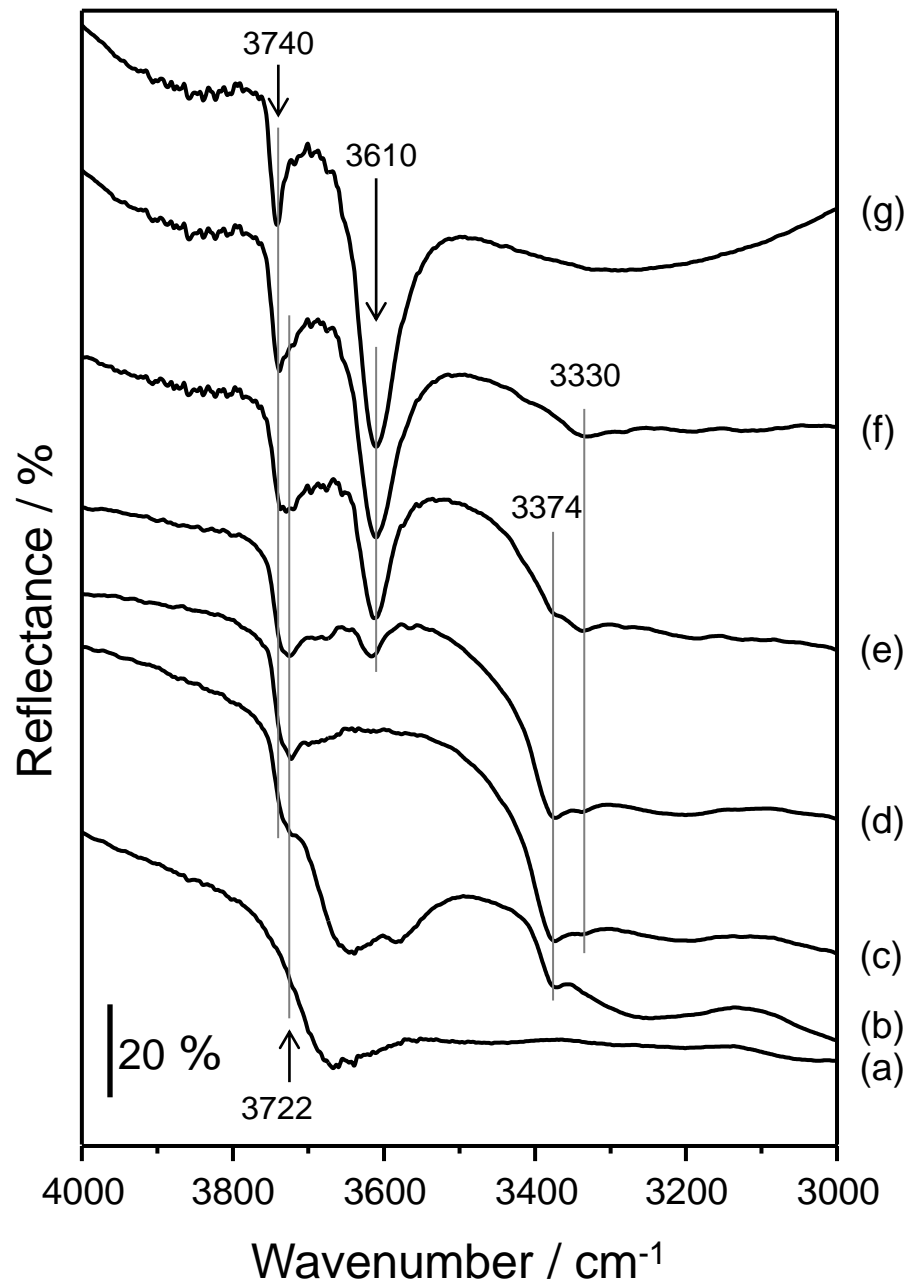

Figure S3 MIR absorption spectra of NH<sub>4</sub>/ZSM-5(39) obtained simultaneously with the NIR spectra shown in Fig. 1; measurement conditions correspond to Fig. 1.

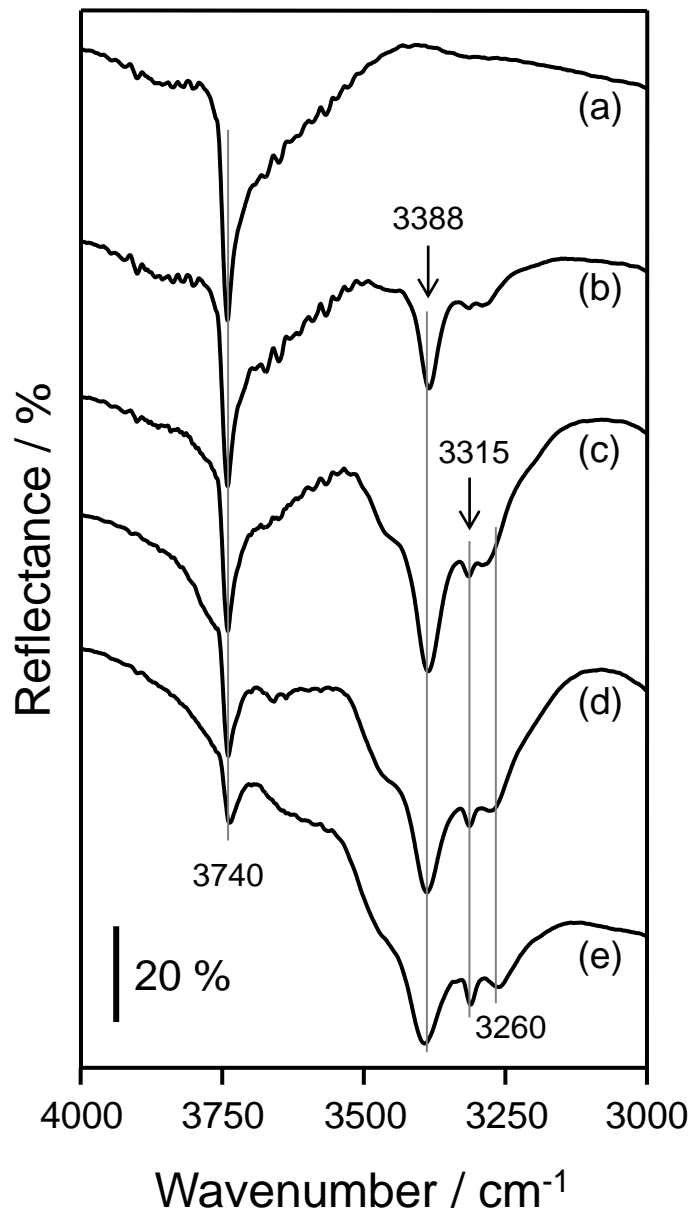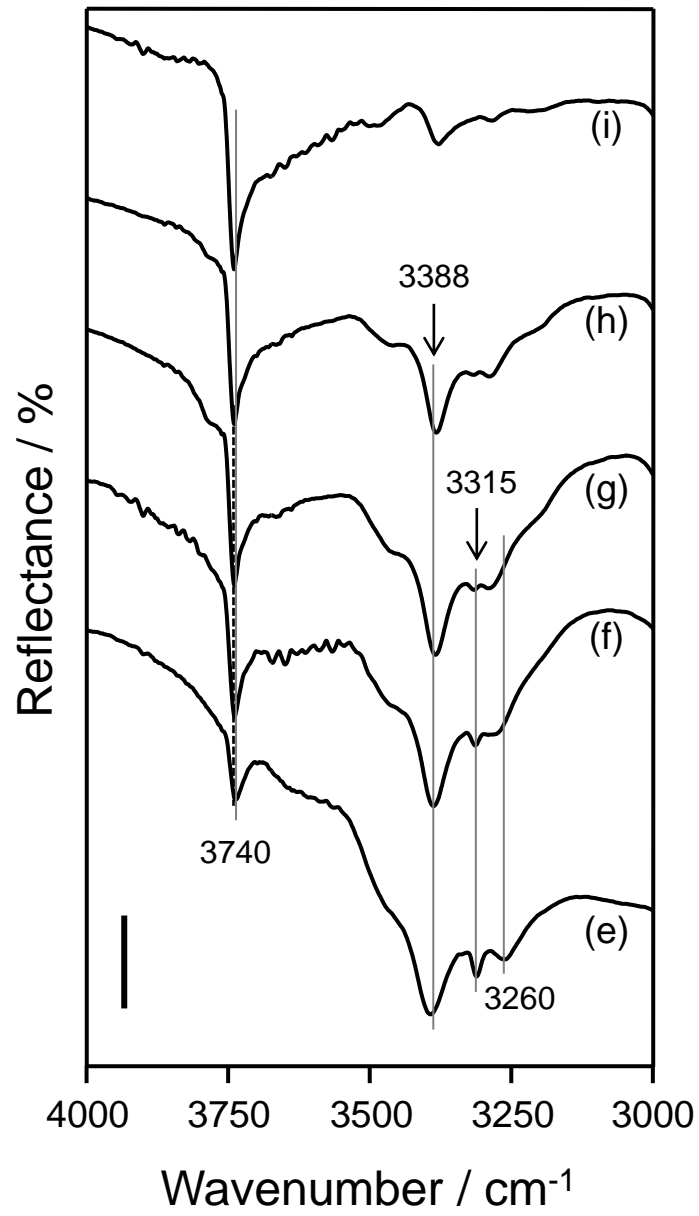

Figure S4 MIR absorption spectra of Na/ZSM-5(23.8) obtained simultaneously with the NIR spectra shown in Fig. 2; measurement conditions correspond to Fig. 2.

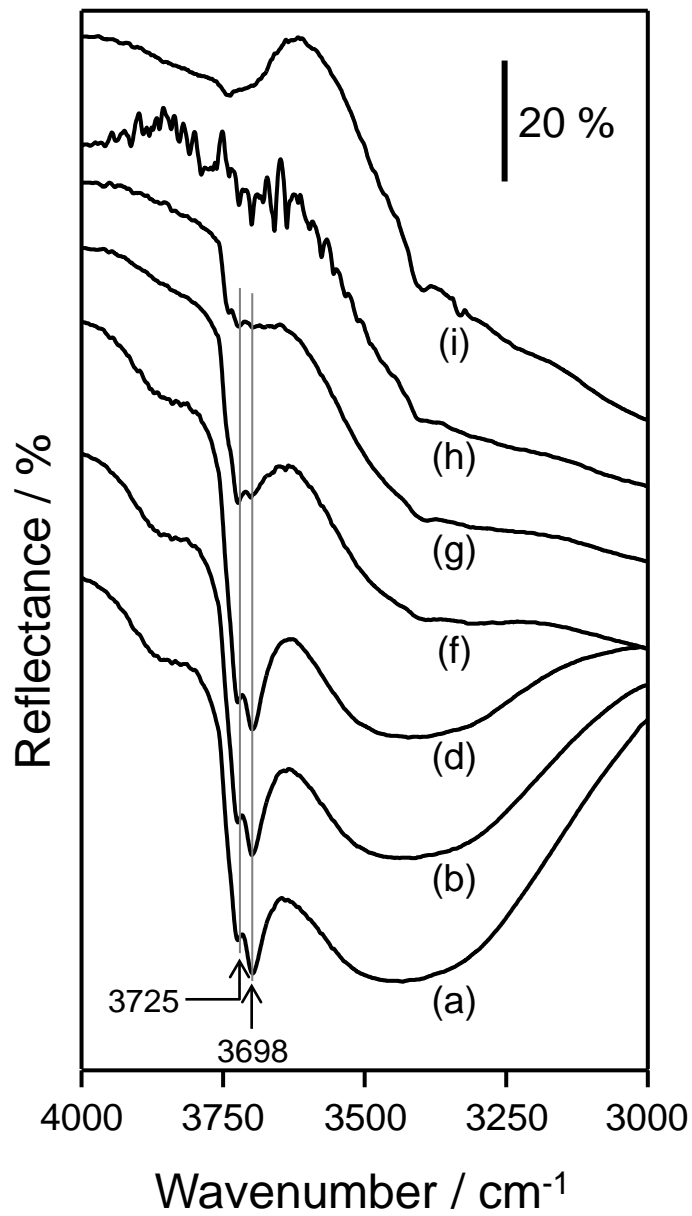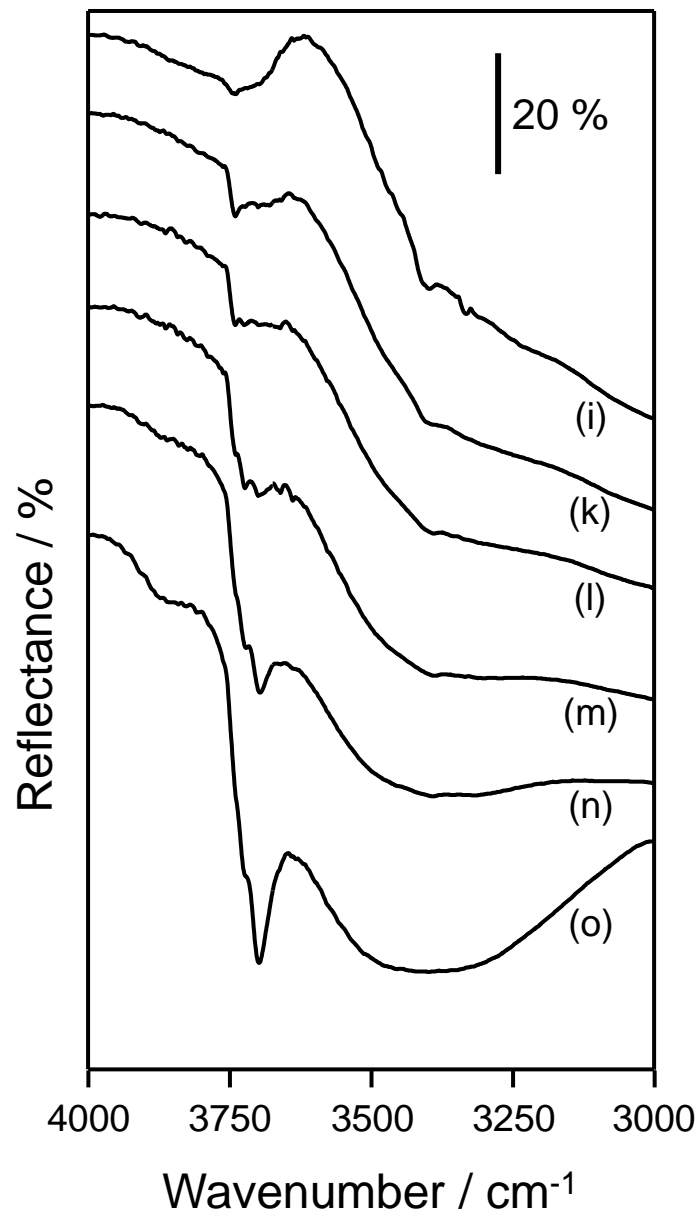

Figure S5 MIR absorption spectra of H/ZSM-5(1500) obtained simultaneously with the NIR spectra shown in Fig. 4; measurement conditions correspond to Fig. 4 (spectra (c), (e), and (j) were omitted for simplification).

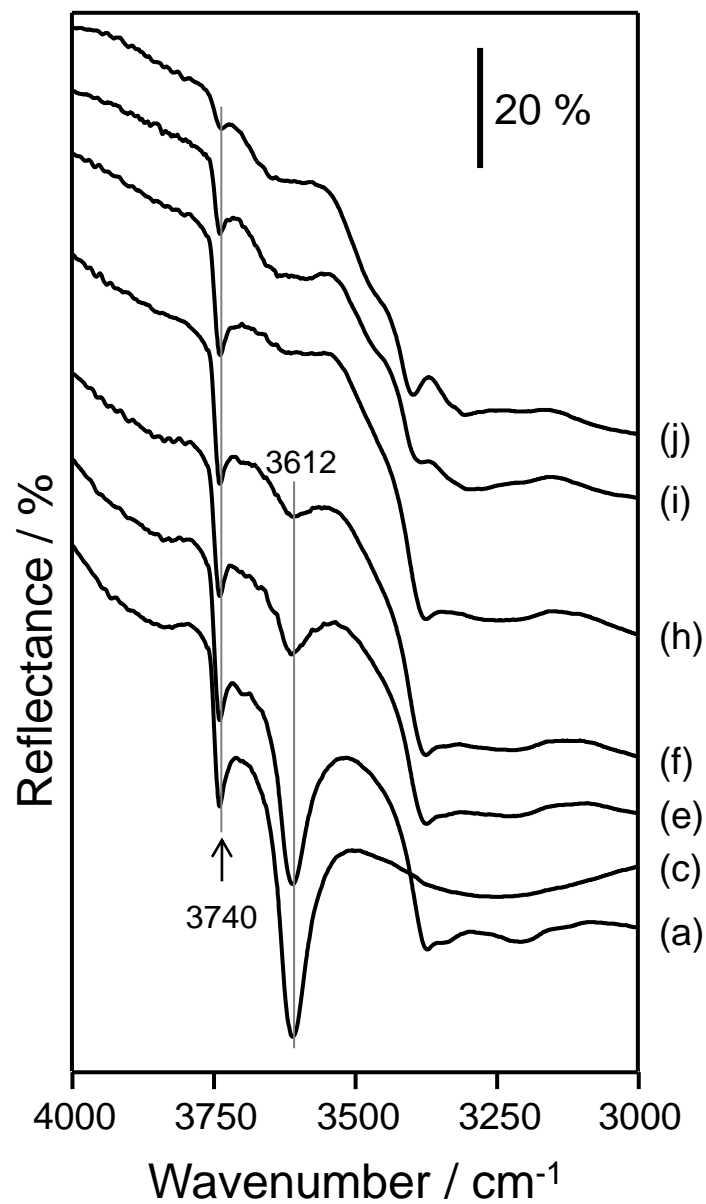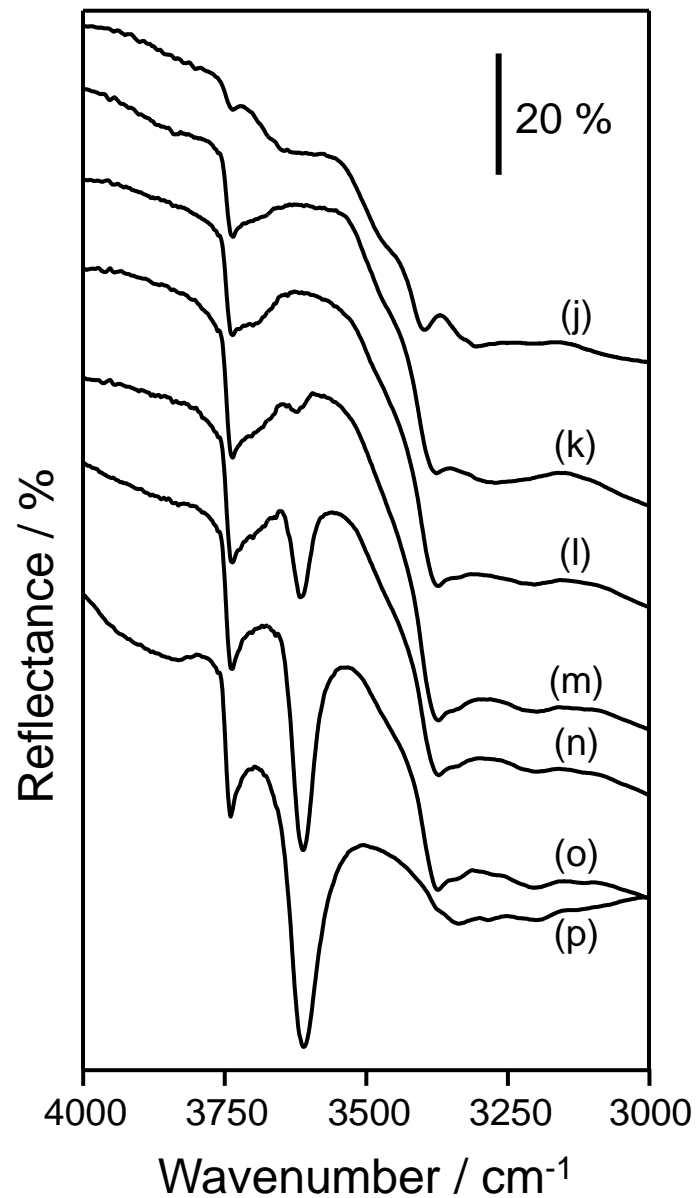

Figure S6 MIR absorption spectra of H/ZSM-5(39) obtained at simultaneously with the NIR spectra shown in Fig. 6; measurement conditions correspond to Fig. 6 (spectra (b), (d), and (g) were omitted for simplification).
